# Supplementary figures and images for: Cryptococcus gattii in North American Pacific Northwest: Whole-Population Genome Analysis Provides Insights into Species Evolution and Dispersal
Source: PubMed Central journal article supplement — mBio. 2014 Jul 15;5(4):e01464-14. doi: 10.1128/mBio.01464-14 (PMC4161256; doi:10.1128/mbio.01464-14), 2014-07-15

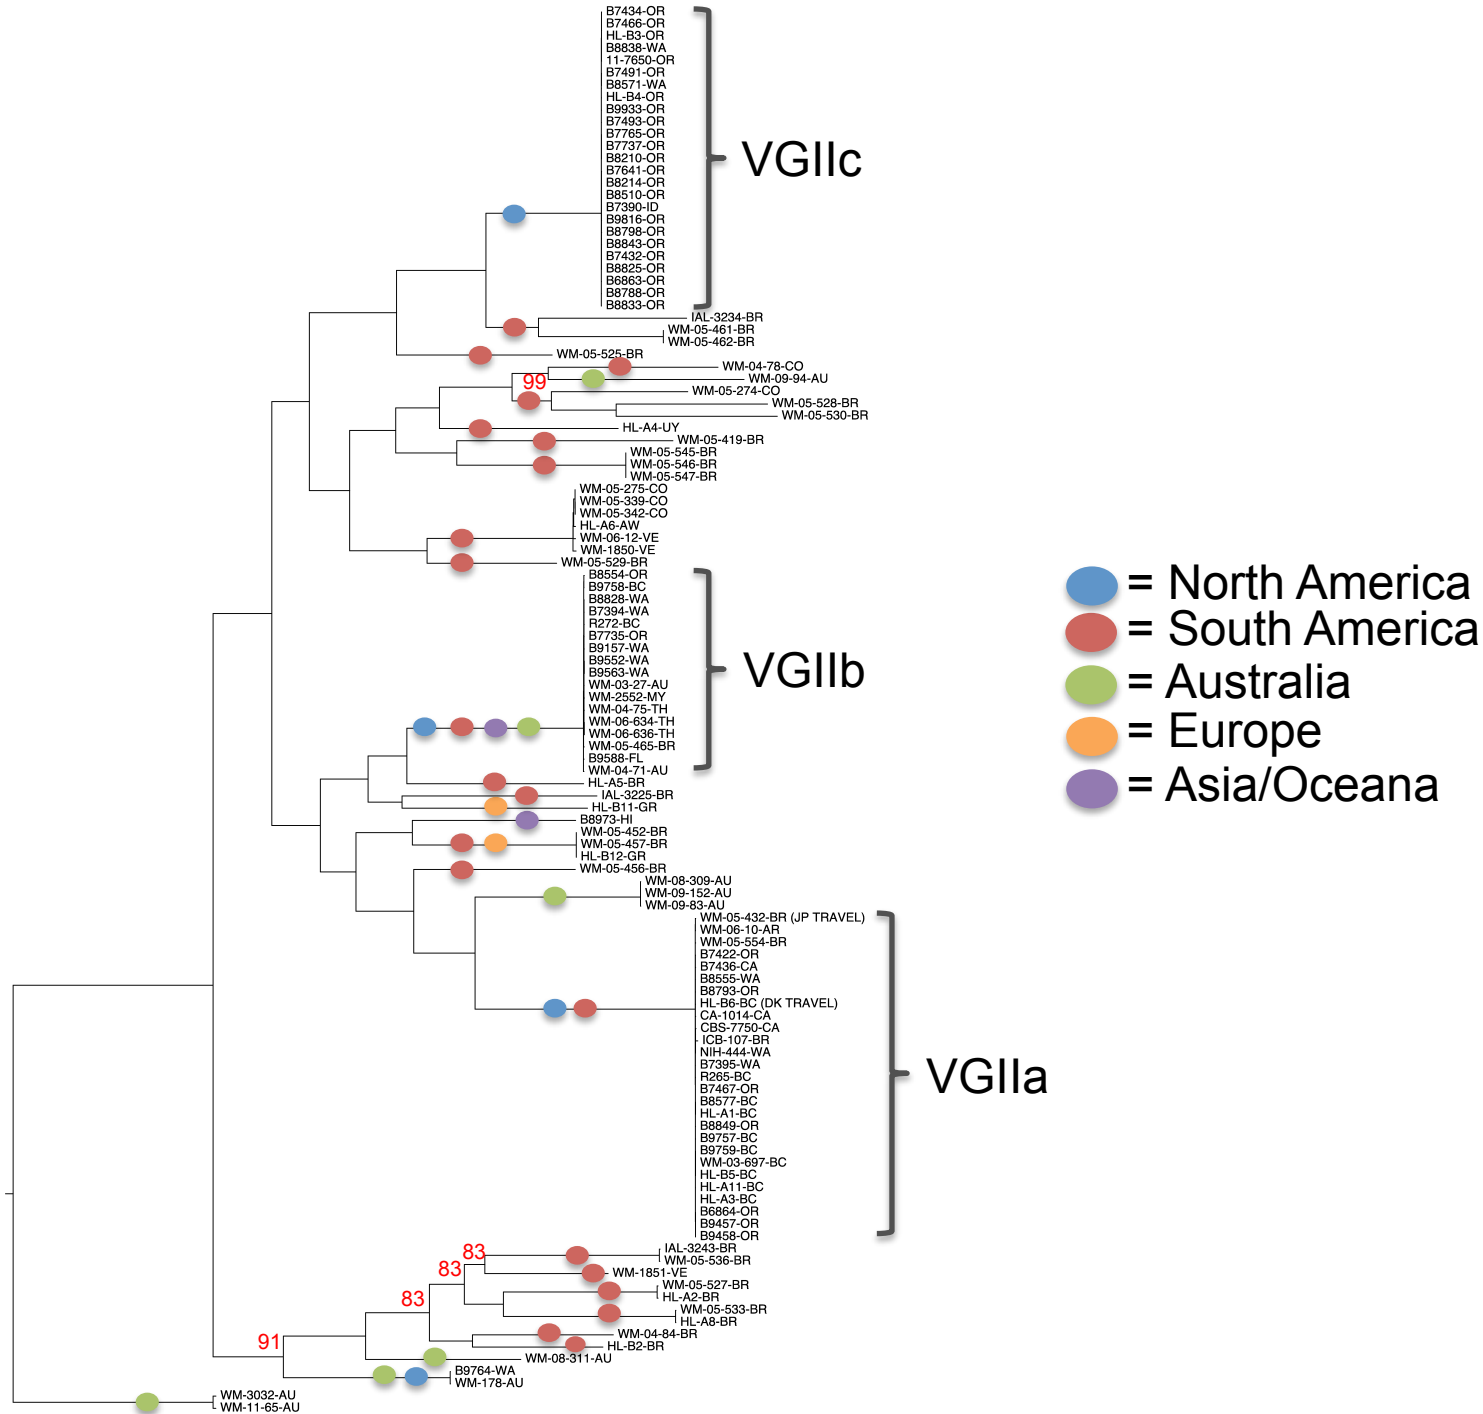

Supplement: mbo004141902sf02.pdf [file mbo004141902sf02.pdf]
